# Supplementary material for: A reversible fluorescent probe for circulatory detection of sulfites through a redox-based tandem reaction
Source: Royal Society of Chemistry journal article supplement (doi:10.1039/c4ra10137e), 2014-10-08
Supplement: c4ra10137e1.pdf [file c4ra10137e1.pdf]

## Supporting information

### **A reversible fluorescent probe for circulatory detecting of sulfites through a redox-based tandem reaction**

Zhixue Liu,<sup>a</sup> Shujing Guo,<sup>a</sup> Jingyu Piao,<sup>a</sup> Xin Zhou<sup>\*a,b</sup> and Xue Wu<sup>\*a</sup>

<sup>a</sup> Department of Chemistry, Faculty of Science, Yanbian University, Yanji, Jilin, 133002 (P.R. China). E-mail: wuxue@ybu.edu.cn. Fax: +86-433-2732456; Tel: +86-433-2732299.

<sup>b</sup> Research Center for Chemical Biology, Yanbian University, Yanji, Jilin, 133002 (P.R. China). E-mail: Hsinzh@yahoo.com.

## Experimental Section

### Materials and Methods

All chemicals and solvents were of analytic grade and bought from commercial sources without further purification. The solutions of anions were prepared from their sodium salts. The **1** was dissolved into DMSO to prepare the stock solutions with a concentration of 1 mM and the iodine solutions was also prepared stock in DMSO. All spectroscopic measurements were performed in PBS (10 mM, pH 7.4) buffer. UV-vis spectra were recorded on Perkin Elmer Lambda 3500 UV-vis spectra with a 1.0 cm quartz cell. PL spectra were conducted on Fluorescence Spectrophotometer (RF-540). MALDI-TOF mass spectra were recorded on a Shimadzu MALDI AXIMA-CFR+ Spectrometer.  $^1\text{H}$  and  $^{13}\text{C}$  NMR spectra were recorded on a Bruker AV-300 (300 MHz) spectrometer with TMS as the reference.

### Detection limit

The detection limit was calculated based on the fluorescence titration. To determine the S/N ratio, the emission intensity of **1** without  $\text{HSO}_3^-$  was measured by 10 times and the standard deviation of blank measurements was determined. Under the present conditions, a good linear relationship between the fluorescence intensity and the  $\text{HSO}_3^-$  concentration could be obtained in the 0-60  $\mu\text{M}$  ( $R = 0.99191$ ). The detection limit is then calculated with the equation: detection limit =  $3\sigma_{bi}/m$ , where  $\sigma_{bi}$  is the standard deviation of blank measurements;  $m$  is the slope between intensity versus

sample concentration. The detection limit was measured to be 21 nM at S/N = 3.

### **Chromatographic conditions and sample preparation**

The HPLC column was C18, 250 × 4.6 mm ID, with 5 μm particles (Thermo Scientific, USA) with a suitable guard-column. Mobile phase A was comprised of a mixture of methanol and water (70:30 [v/v]) and mobile phase B was comprised of a mixture of methanol and water (40:60 [v/v]). The elution programme was employed with a mobile phase flow-rate of 1 ml/ min. The column-oven and auto-sampler temperatures were set at 30 °C and 25 °C, respectively. The detection wavelength was 518 nm for A and 410 nm for B. Samples were prepared as used for detection of UV-Vis spectra and fluorescence spectra.

### **Cell culture and fluorescence imaging experiment**

Hela cells were grown in SPP medium (1% proteose peptone, 0.2% glucose, 0.1% yeast extract, 0.003% EDTA ferric sodium salt) at 37 °C in 5% CO<sub>2</sub>. Cells were plated on 6-well plate and allowed to adhere for 12 hours. Fluorescence imaging was performed with a Fluorescence Microscope with a 40×oil-immersion objective lens. For fluorescence microscopy experiments, cells were washed with PBS and then incubated with **1** (5 μM) in PBS for 30 min at 37 °C. Experiments to assess HSO<sub>3</sub><sup>-</sup> uptake were performed in the same media supplemented with 100 μM NaHSO<sub>3</sub> for 30 min and H<sub>2</sub>O<sub>2</sub> for 30 min at 37 °C, respectively. Cell imaging was investigated after washing cells with physiological saline. Emission was collected at 400~440 nm

(excited at 410 nm) for green channel and at 530~550 nm (excited at 518 nm) for red channel.

## Synthesis

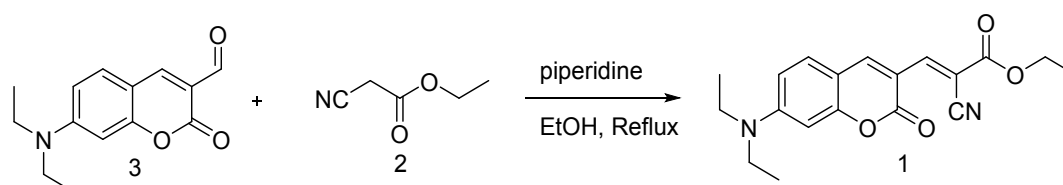

**Compound 1:** diethylaminocoumarin-3-aldehyde **3** (100 mg, 0.4 mmol) and compound **2** (46 mg, 0.4 mmol) were dissolved in ethanol (3 mL) and refluxed for 10 h. After being cooled to room temperature, the solid was filtered off and washed with ethanol to afford compound **1** (95 mg, yield: 70%).  $^1\text{H NMR}$  (300 MHz,  $\text{CDCl}_3$ )  $\delta$  8.89 (s, 1H), 8.56 (s, 1H), 7.42 (d,  $J = 9.0$  Hz, 1H), 6.66 (d,  $J = 9.0$  Hz, 1H), 4.36 (q,  $J = 7.1$  Hz, 2H), 3.49 (q,  $J = 7.1$  Hz, 4H), 1.38 (t,  $J = 7.1$  Hz, 3H), 1.27 (t,  $J = 7.1$  Hz, 6H). MS:  $[\text{M}^+]$  at 340.5.

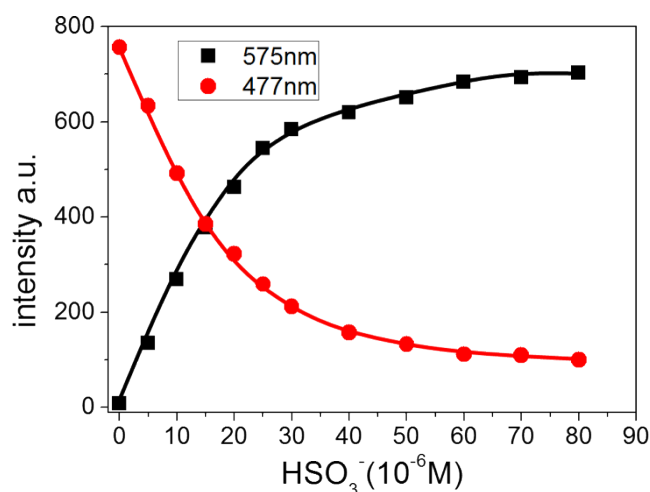

**Fig S1.** Fluorescent intensity changes of **1** ( $10 \mu\text{M}$ ) as a function of the concentration of  $\text{HSO}_3^-$ . Each spectrum was recorded after 5 min. ( $\lambda_{\text{ex}} = 446$  nm. Slits: 3/5 nm)

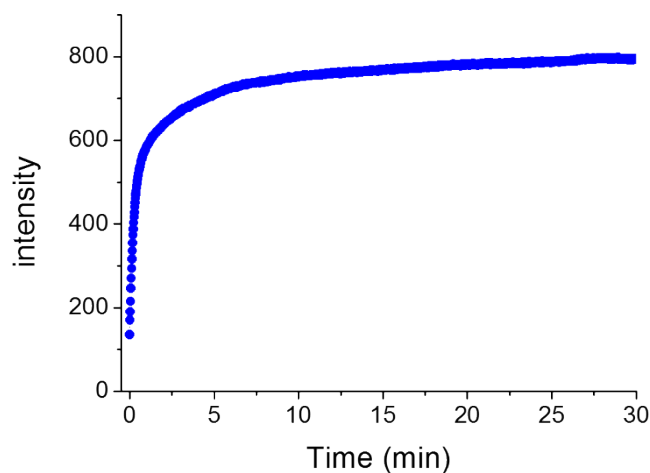

**Fig S2.** Time-course fluorescence response spectra of **1** (10  $\mu\text{M}$ ) towards  $\text{HSO}_3^-$  (5 equiv.) in PBS buffer (pH 7.4, 10 mM, containing 30% DMSO). ( $\lambda_{\text{ex}}=446$  nm. Slits: 3/5 nm)

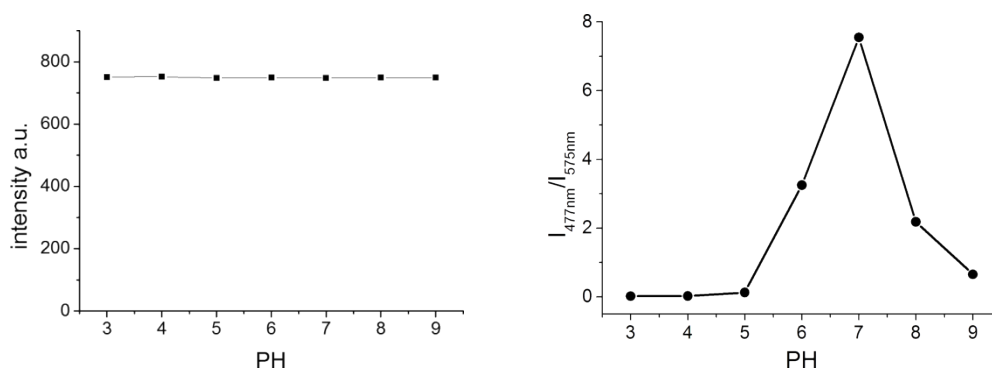

**Fig S3.** (Left): Fluorescence spectra at 575 nm of **1** (10  $\mu\text{M}$ ) at varied pH values. (Right): The ratio of fluorescent intensities at 477 nm and 575 nm for probe **1** (10  $\mu\text{M}$ ) in the presence of  $\text{NaHSO}_3$  (5 equiv.) at varied pH values. Each spectrum was recorded after 5 min. ( $\lambda_{\text{ex}}=446$  nm. Slits: 3/5 nm)

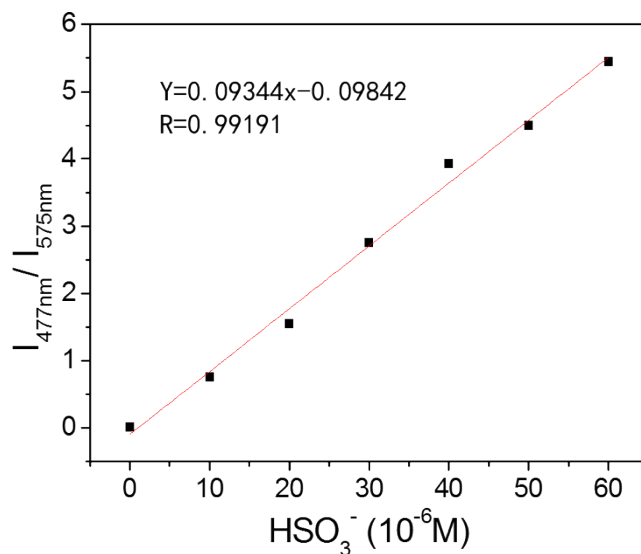

**Fig S4.** The line relationship between the fluorescent intensity ratio of the **1** (10  $\mu\text{M}$  at 477 nm and 575nm) and the concentration of the  $\text{HSO}_3^-$  in PBS buffer (pH 7.4, 10 mM, containing 30% DMSO). Each spectrum was recorded after 5 min. ( $\lambda_{\text{ex}}=446$  nm. Slits: 3/5 nm)

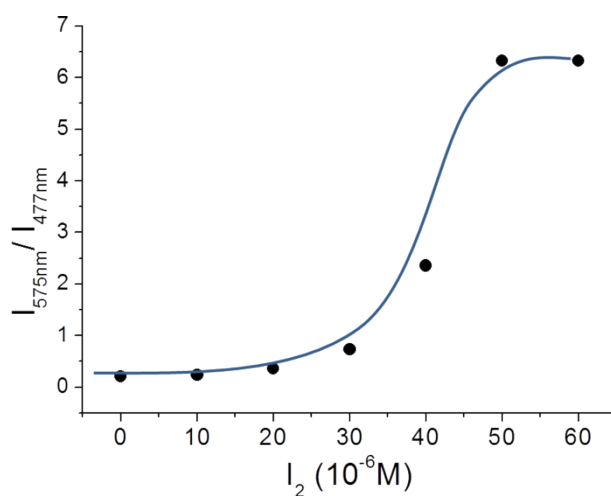

**Fig S5.** Fluorescence ratio of **1** (10  $\mu\text{M}$ ) with  $\text{NaHSO}_3$  (50  $\mu\text{M}$ ) upon addition  $\text{I}_2$  (0–60  $\mu\text{M}$ ) in PBS buffer (pH 7.4, 10 mM, containing 30% DMSO). Each spectrum was recorded after 5 min. ( $\lambda_{\text{ex}}=446$  nm. Slits: 3/5 nm)

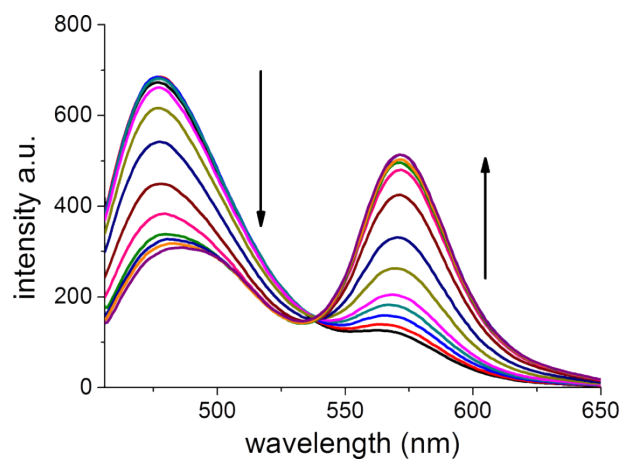

**Fig S6.** Fluorescence spectra of **1**/ $\text{HSO}_3^-$  mixtures ( $[\mathbf{1}] = 10 \mu\text{M}$ ,  $[\text{HSO}_3^-] = 50 \mu\text{M}$ ) upon addition of  $\text{H}_2\text{O}_2$  (3mM) in PBS buffer (pH 7.4, 10 mM, containing 30% DMSO). Each spectrum was recorded after 5 min. ( $\lambda_{\text{ex}} = 446 \text{ nm}$ . Slits: 3/5 nm).

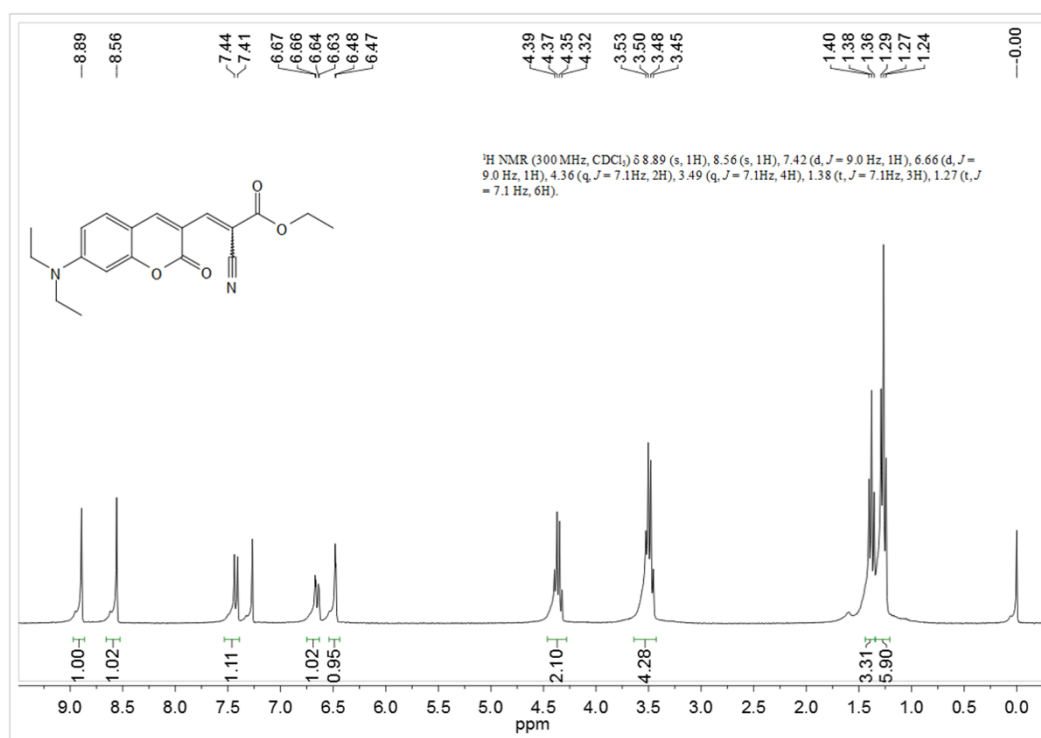

**Figure S7.**  $^1\text{H}$  NMR spectra of compound **1**.

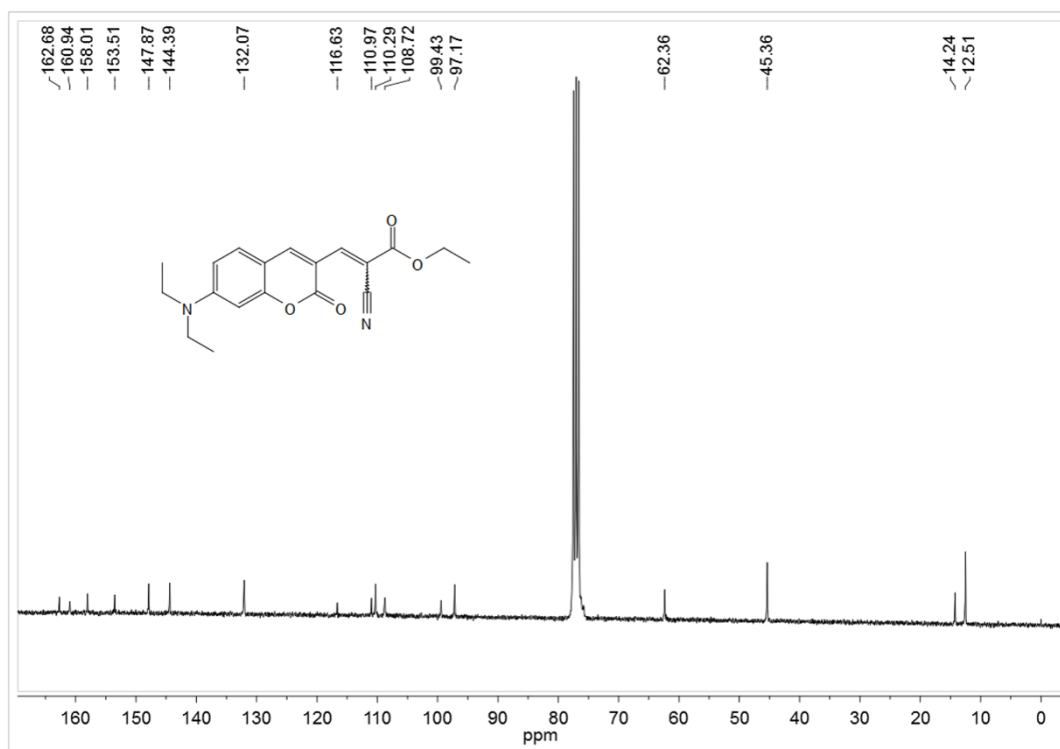

**Figure S8.** <sup>13</sup>C NMR spectra of compound 1.

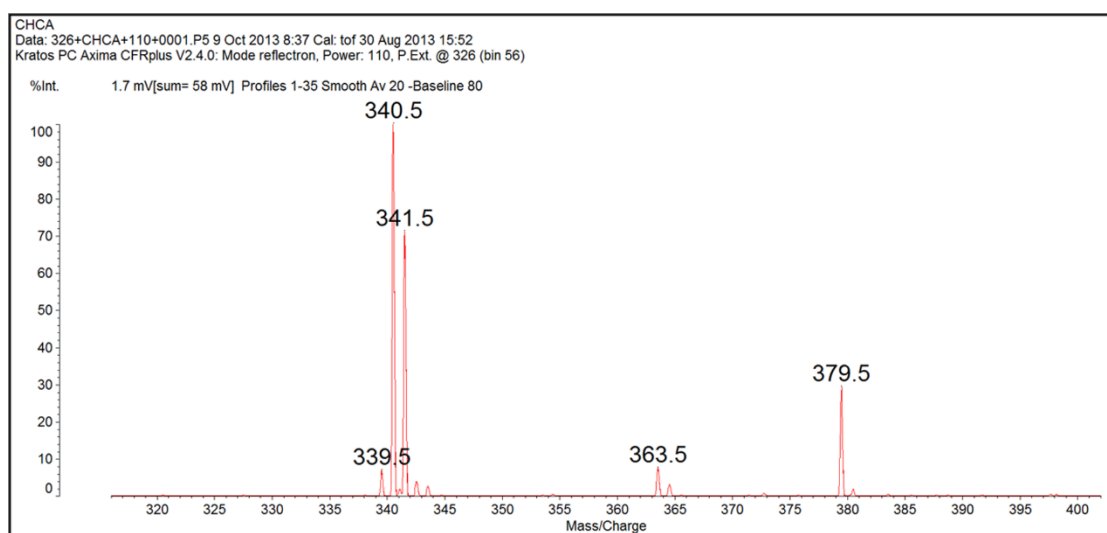

**Figure S9.** TOF-MS spectra of compound 1.
